# Supplementary material for: Superhydrophobic surface on copper via a one-step solvent-free process and its application in oil spill collection
Source: Royal Society of Chemistry journal article supplement (doi:10.1039/c5ra06791j), 2015-01-01
Supplement: c5ra06791j2.pdf [file c5ra06791j2.pdf]

***Supplementary material for “Green superhydrophobic surface on copper via a one-step process and its application in oil spill collection”***

*Damei Lv,<sup>b</sup> Junfei Ou,<sup>b,\*</sup> Weihua Hu,<sup>b</sup> Xubiao Luo,<sup>a,\*</sup> Fajun Wang<sup>b</sup>*

*<sup>a</sup>Key Laboratory of Jiangxi Province for Persistent Pollutants Control and Resources Recycle  
(Nanchang Hangkong University), Nanchang 330063, People’s Republic of China*

*<sup>b</sup>School of Materials Science and Engineering, Nanchang Hangkong University, Nanchang  
330063, People’s Republic of China*

---

\* To whom correspondence should be addressed. Tel.: +86-971-6453210; fax: +86-971-6453210.  
E-mail: oujunfei\_1982@163.com

Figure S1. FE-SEM images of the copper substrate, Cu-HT, and Cu-DT-HT. Inset shows the drop of water on SHS.

Fig. S2. Images of water droplets sit on and kerosene droplets spread out on so-obtained copper substrate and copper mesh.

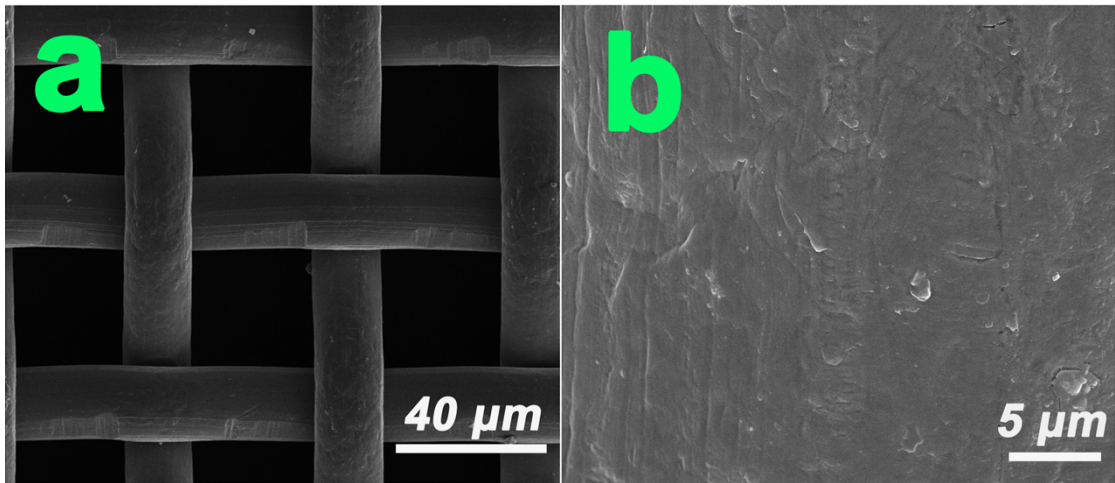

Fig. S3. FE-SEM images of the copper mesh.

Mov. S1. Oil spill collection process.
